# Supplementary material for: 22-Azametallacrown-8 complex with a triazole-bridged ligand: synthesis, structure and magnetic properties
Source: Royal Society of Chemistry journal article supplement (doi:10.1039/c4dt02722a), 2014-09-26
Supplement: c4dt02722a1.pdf [file c4dt02722a1.pdf]

## Supporting Information

### 22-Azametallacrown-8 complex with triazole-bridged ligand: synthesis, structure and magnetic properties

Hua Yang, Qing-Xia Yao, Yun-Wu Li, Da-Cheng Li,\* Jian-Min Dou\*

Shandong Provincial Key Laboratory of Chemical Energy Storage and Novel Cell Technology, School of Chemistry and Chemical Engineering, Liaocheng University, 252059 Liaocheng, People's Republic of China

#### Contents:

**Fig. S1** The coordination modes of L ligands: (a),  $\mu_2:\eta^1:\eta^1:\eta^1$ ; (b),  $\mu_3:\eta^2:\eta^1:\eta^1$ , (c),  $\mu_2:\eta^1:\eta^1:\eta^1$

**Fig. S2** Mn8 metal topologies

**Fig. S3** The 3D packing arrangement formed through C–H $\cdots$ N, C–H $\cdots$  $\pi$  and  $\pi\cdots\pi$  interactions

**Fig. S4** The Jahn-Teller axes of Mn<sup>III</sup> centers with sky blue.

**Fig. S5** Plots of isothermal magnetization,  $M$ , vs. field,  $H$ , for **1** at temperatures of between 1.8 K and 8 K.

**Fig. S6** In-phase of AC  $\chi'_M T$  vs  $T$  plots (left panel) and out-of-phase  $\chi''_M$  vs  $T$  plots (right panel) in the 1.8-16 K range with DC = 0 Oe.

**Table S1** Crystal data and structure refinement for complex **1**.

**Table S2** Selected bond distances (Å) and angles (°) for complex **1**.

**Table S3** BVS calculations for all manganese ions in complex **1**.

### **X-ray Crystallography.**

Single-crystal X-ray diffraction data for complex **1** were collected on a Bruker Smart CCD area-detector diffractometer with Mo K $\alpha$  radiation ( $\lambda = 0.71073 \text{ \AA}$ ) by  $\omega$ -scan mode operating at room temperature. The program *SAINTE* was used for integration of the diffraction profiles, and semiempirical absorption corrections were applied using *SADABS*.<sup>1,2</sup> All of the structures were solved by direct methods using the *SHELXS* program of the *SHELXTL* package and refined by full-matrix least-squares methods with *SHELXL*.<sup>3</sup> Metal ions were located from the *E* maps, and the other non-H atoms were located in successive difference Fourier syntheses and refined with anisotropic thermal parameters on *F*<sup>2</sup>. Generally, C-bound H atoms were determined theoretically and refined with isotropic thermal parameters riding on their parents. H atoms of OH and DMF were first located by difference Fourier *E* maps and then treated isotropically as riding.

1. SAINTE v5.0-6.01; Bruker Analytical X-ray Systems Inc.: Madison, WI, 1998.
2. Sheldrick, G. M. SADABS; University of Göttingen: Göttingen, Germany.
3. SHELXTL v5.1, Bruker Analytical X-ray Systems Inc.: Madison, WI, 1999.

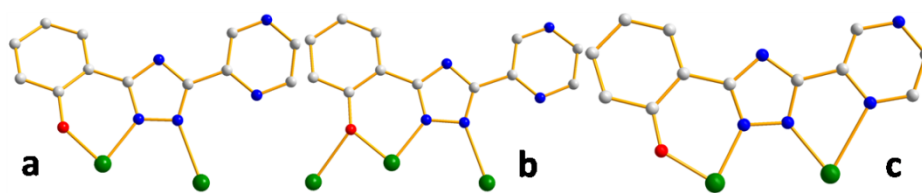

Fig. S1 The coordination modes of L ligands: (a),  $\mu_2\text{-}\eta^1\text{-}\eta^1\text{-}\eta^1$ ; (b),  $\mu_3\text{-}\eta^2\text{-}\eta^1\text{-}\eta^1$ , (c),  $\mu_2\text{-}\eta^1\text{-}\eta^1\text{-}\eta^1\text{-}\eta^1$

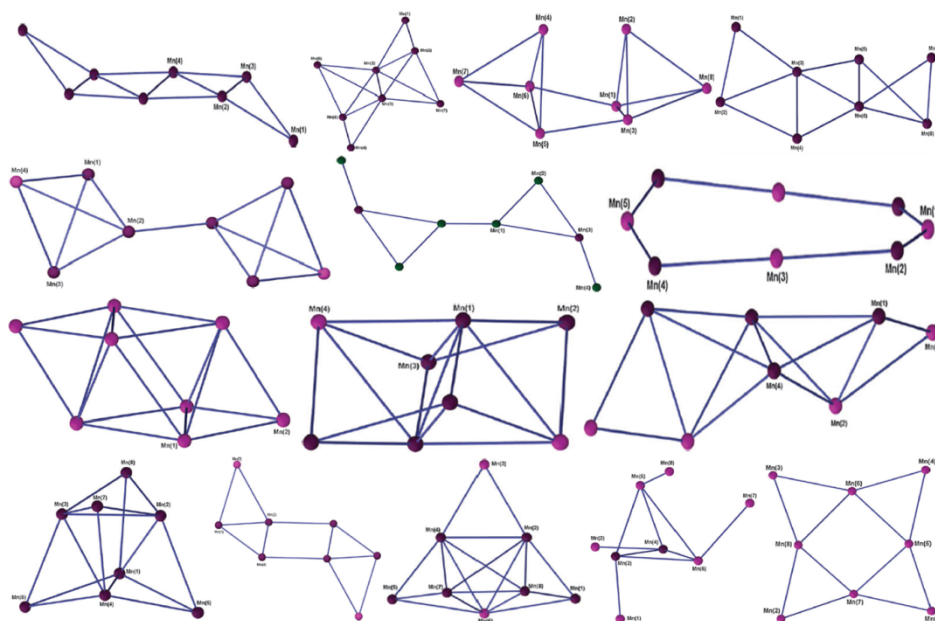

Fig. S2 Mn8 metal topologies

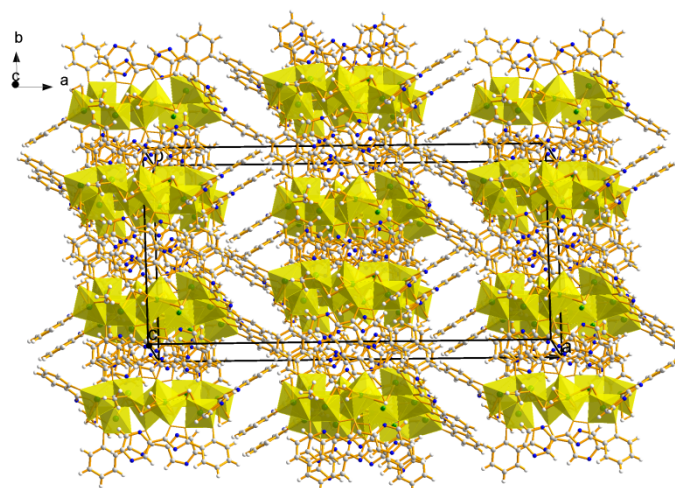

Fig. S3 The 3D packing arrangement formed through C-H $\cdots$ N, C-H $\cdots$  $\pi$  and  $\pi\cdots\pi$  interactions

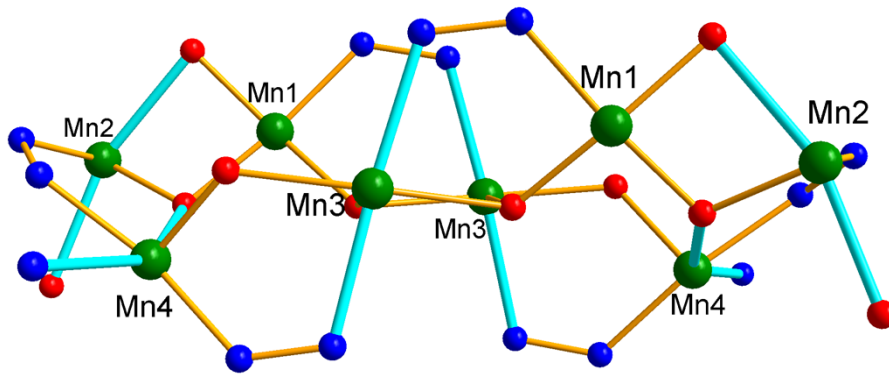

Fig. S4 The Jahn-Teller axes of Mn<sup>III</sup> centers with sky blue.

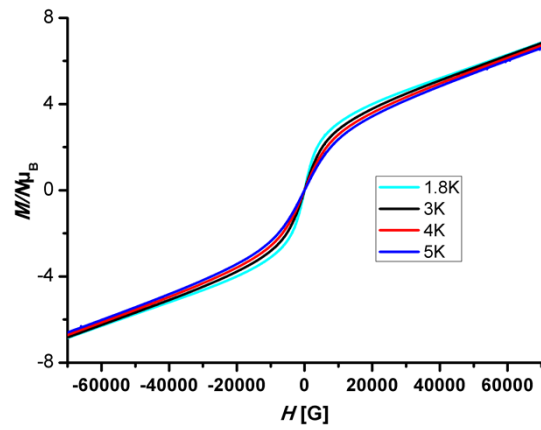

Fig. S5 Plots of isothermal magnetization,  $M$ , vs. field,  $H$ , for **1** at temperatures of between 1.8 K and 8 K.

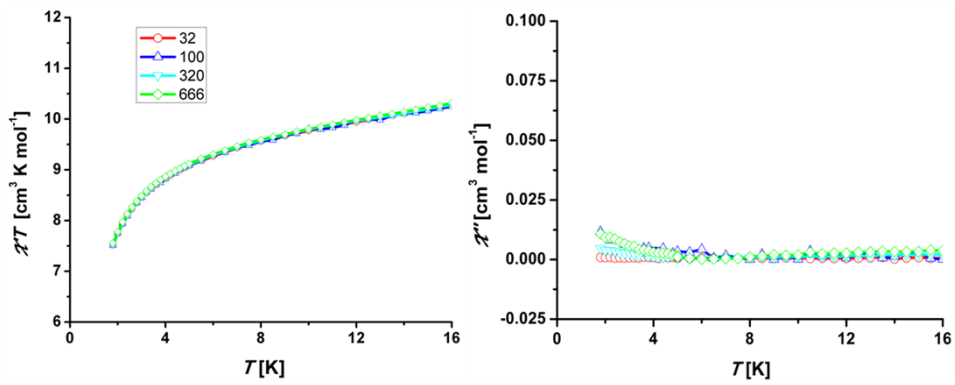

Fig. S6 In-phase of AC  $\chi'_M T$  vs  $T$  plots (left panel) and out-of-phase  $\chi''_M$  vs  $T$  plots (right panel) in the 1.8-16 K range with DC = 0 Oe.

**Table S1.** Crystal data and structure refinement for the complex **1**.

| <b>1</b>                                                     |                                                                                 |
|--------------------------------------------------------------|---------------------------------------------------------------------------------|
| Empirical formula                                            | C <sub>76</sub> H <sub>60</sub> Mn <sub>8</sub> N <sub>30</sub> O <sub>20</sub> |
| Formula weight                                               | 2153.06                                                                         |
| Crystal system                                               | Monoclinic                                                                      |
| space group                                                  | <i>C2/c</i>                                                                     |
| <i>a</i> (Å)                                                 | 37.600(3)                                                                       |
| <i>b</i> (Å)                                                 | 18.2991(17)                                                                     |
| <i>c</i> (Å)                                                 | 14.1600(12)                                                                     |
| $\alpha$ (°)                                                 | 90                                                                              |
| $\beta$ (°)                                                  | 101.491(2)                                                                      |
| $\gamma$ (°)                                                 | 90                                                                              |
| <i>V</i> (Å <sup>3</sup> )                                   | 9547.5(14)                                                                      |
| <i>Z</i>                                                     | 4                                                                               |
| $\rho$ (Mg/m <sup>3</sup> )                                  | 1.498                                                                           |
| Absorption coefficient(mm <sup>-1</sup> )                    | 1.102                                                                           |
| <i>F</i> (000)                                               | 4344                                                                            |
| Crystal size (mm <sup>3</sup> )                              | 0.13 × 0.12 × 0.11                                                              |
| Theta range for data collection                              | 2.67 to 25.02 °                                                                 |
| Reflections collected / unique                               | 22432 / 8418 [ <i>R</i> <sub>int</sub> = 0.1154]                                |
| Completeness to $\theta$                                     | 99.8 %                                                                          |
| Max. and min. transmission                                   | 0.8884 and 0.8700                                                               |
| Data / restraints / parameters                               | 8418 / 0 / 605                                                                  |
| Goodness-of-fit on <i>F</i> <sup>2</sup>                     | 1.000                                                                           |
| <i>R</i> <sub>1</sub> ( <i>I</i> > 2 $\sigma$ ( <i>I</i> ))  | 0.0820                                                                          |
| <i>wR</i> <sub>2</sub> ( <i>I</i> > 2 $\sigma$ ( <i>I</i> )) | 0.1798                                                                          |
| <i>R</i> <sub>1</sub> (all data)                             | 0.1605                                                                          |
| <i>wR</i> <sub>2</sub> (all data)                            | 0.2025                                                                          |

**Table S2.** Selected bond distances (Å) and angles (°) for complex **1**.

|            |          |              |          |
|------------|----------|--------------|----------|
| Mn(1)-O(6) | 1.843(5) | Mn(3)-O(7)#1 | 2.118(5) |
| Mn(1)-O(7) | 1.889(5) | Mn(3)-O(10)  | 2.210(7) |
| Mn(1)-O(1) | 1.894(5) | Mn(3)-N(12)  | 2.303(6) |
| Mn(1)-N(1) | 1.981(7) | Mn(3)-N(2)#1 | 2.311(6) |
| Mn(1)-O(4) | 2.125(5) | Mn(3)-O(7)   | 2.361(5) |
| Mn(2)-O(6) | 1.868(5) | Mn(4)-O(9)   | 1.854(5) |
| Mn(2)-O(2) | 1.873(6) | Mn(4)-O(3)   | 1.875(6) |

---

|                  |            |                     |            |
|------------------|------------|---------------------|------------|
| Mn(2)-N(6)       | 1.972(7)   | Mn(4)-N(11)         | 1.990(6)   |
| Mn(2)-O(5)       | 1.977(6)   | Mn(4)-N(7)          | 2.038(7)   |
| Mn(2)-O(8)       | 2.236(6)   | Mn(4)-O(6)          | 2.154(5)   |
| Mn(2)-O(1)       | 2.326(6)   | Mn(4)-N(9)          | 2.511(6)   |
| Mn(3)-O(9)       | 2.082(5)   |                     |            |
| Mn(1)···Mn(2)    | 2.9408(17) | Mn(2)···Mn(4)       | 3.5040(19) |
| Mn(1)···Mn(3)    | 3.5180(18) | Mn(3)···Mn(2)       | 5.7441(18) |
| Mn(1)···Mn(4)    | 3.4331(16) | Mn(3)···Mn(3)#1     | 3.4391(17) |
| O(6)-Mn(1)-O(7)  | 94.6(2)    | O(5)-Mn(2)-Mn(1)    | 79.83(17)  |
| O(6)-Mn(1)-O(1)  | 85.5(2)    | O(8)-Mn(2)-Mn(1)    | 122.39(16) |
| O(7)-Mn(1)-O(1)  | 167.1(2)   | O(1)-Mn(2)-Mn(1)    | 40.06(14)  |
| O(6)-Mn(1)-N(1)  | 173.0(2)   | O(9)-Mn(3)-O(7)#1   | 162.9(2)   |
| O(7)-Mn(1)-N(1)  | 88.7(2)    | O(9)-Mn(3)-O(10)    | 102.7(2)   |
| O(1)-Mn(1)-N(1)  | 89.9(2)    | O(7)#1-Mn(3)-O(10)  | 94.4(2)    |
| O(6)-Mn(1)-O(4)  | 92.9(2)    | O(9)-Mn(3)-N(12)    | 82.4(2)    |
| O(7)-Mn(1)-O(4)  | 96.8(2)    | O(7)#1-Mn(3)-N(12)  | 96.8(2)    |
| O(1)-Mn(1)-O(4)  | 96.0(2)    | O(10)-Mn(3)-N(12)   | 90.5(2)    |
| N(1)-Mn(1)-O(4)  | 92.8(2)    | O(9)-Mn(3)-N(2)#1   | 100.8(2)   |
| O(6)-Mn(1)-Mn(2) | 37.87(16)  | O(7)#1-Mn(3)-N(2)#1 | 80.6(2)    |
| O(7)-Mn(1)-Mn(2) | 131.25(16) | O(10)-Mn(3)-N(2)#1  | 87.3(2)    |
| O(1)-Mn(1)-Mn(2) | 52.22(17)  | N(12)-Mn(3)-N(2)#1  | 176.4(2)   |
| N(1)-Mn(1)-Mn(2) | 139.80(19) | O(9)-Mn(3)-O(7)     | 84.0(2)    |
| O(4)-Mn(1)-Mn(2) | 80.21(15)  | O(7)#1-Mn(3)-O(7)   | 79.0(2)    |
| O(6)-Mn(2)-O(2)  | 172.8(2)   | O(10)-Mn(3)-O(7)    | 169.6(2)   |
| O(6)-Mn(2)-N(6)  | 89.0(3)    | N(12)-Mn(3)-O(7)    | 82.50(19)  |
| O(2)-Mn(2)-N(6)  | 85.7(3)    | N(2)#1-Mn(3)-O(7)   | 99.30(19)  |
| O(6)-Mn(2)-O(5)  | 95.8(2)    | O(9)-Mn(4)-O(3)     | 176.0(2)   |
| O(2)-Mn(2)-O(5)  | 89.5(3)    | O(9)-Mn(4)-N(11)    | 88.1(2)    |
| N(6)-Mn(2)-O(5)  | 175.1(3)   | O(3)-Mn(4)-N(11)    | 88.0(2)    |
| O(6)-Mn(2)-O(8)  | 89.6(2)    | O(9)-Mn(4)-N(7)     | 95.8(2)    |
| O(2)-Mn(2)-O(8)  | 95.4(2)    | O(3)-Mn(4)-N(7)     | 88.1(3)    |
| N(6)-Mn(2)-O(8)  | 90.7(3)    | N(11)-Mn(4)-N(7)    | 164.6(3)   |
| O(5)-Mn(2)-O(8)  | 88.6(2)    | O(9)-Mn(4)-O(6)     | 91.3(2)    |
| O(6)-Mn(2)-O(1)  | 73.5(2)    | O(3)-Mn(4)-O(6)     | 89.9(2)    |
| O(2)-Mn(2)-O(1)  | 101.9(2)   | N(11)-Mn(4)-O(6)    | 114.1(2)   |

---

|                  |           |                  |          |
|------------------|-----------|------------------|----------|
| N(6)-Mn(2)-O(1)  | 93.8(2)   | N(7)-Mn(4)-O(6)  | 80.8(2)  |
| O(5)-Mn(2)-O(1)  | 88.2(2)   | O(9)-Mn(4)-N(9)  | 89.3(2)  |
| O(8)-Mn(2)-O(1)  | 162.4(2)  | O(3)-Mn(4)-N(9)  | 91.6(2)  |
| O(6)-Mn(2)-Mn(1) | 37.28(15) | N(11)-Mn(4)-N(9) | 96.4(3)  |
| O(2)-Mn(2)-Mn(1) | 140.1(2)  | N(7)-Mn(4)-N(9)  | 68.8(2)  |
| N(6)-Mn(2)-Mn(1) | 104.6(2)  | O(6)-Mn(4)-N(9)  | 149.5(2) |

Symmetry transformations used to generate equivalent atoms: #1 -x,y,-z+3/2

**Table S3.** BVS calculations for all manganese ions in complex 1.

| Atoms | Mn <sup>II</sup> | Mn <sup>III</sup> | Mn <sup>IV</sup> |
|-------|------------------|-------------------|------------------|
| Mn(1) | 3.518            | <b>3.242</b>      | 3.187            |
| Mn(2) | 3.384            | <b>3.218</b>      | 3.158            |
| Mn(3) | <b>2.000</b>     | 1.846             | 1.813            |
| Mn(4) | 3.512            | <b>3.243</b>      | 3.178            |
